1 **Structural insights into GlcNAc-1-phosphotransferase that directs**  
2 **lysosomal protein transport**

3

4 Shuo Du<sup>1,2†</sup>, Guopeng Wang<sup>1†</sup>, Zhiying Zhang<sup>1,2</sup>, Chengying Ma<sup>1,3,4</sup>, Ning Gao<sup>1,3,4\*</sup>, Junyu  
5 Xiao<sup>1,2,4,5\*</sup>

6

7 <sup>1</sup>School of Life Sciences, Peking University, Beijing 100871, China.

8 <sup>2</sup>State Key Laboratory of Protein and Plant Gene Research, Peking University, Beijing  
9 100871, China.

10 <sup>3</sup>State Key Laboratory of Membrane Biology, Peking University, Beijing 100871, China.

11 <sup>4</sup>Peking-Tsinghua Center for Life Sciences, Peking University, Beijing 100871, China.

12 <sup>5</sup>Beijing Advanced Innovation Center for Genomics, Peking University, Beijing 100871,  
13 China.

14

15 †These authors contributed equally to this work.

16 \*Correspondence: Ning Gao ([gaon@pku.edu.cn](mailto:gaon@pku.edu.cn)), Junyu Xiao ([junyuxiao@pku.edu.cn](mailto:junyuxiao@pku.edu.cn)).

17

## 1 **Abstract**

2       GlcNAc-1-phosphotransferase (GNPT) catalyzes the initial step in the formation of the  
3       mannose-6-phosphate tag that labels ~60 lysosomal proteins for transport. Mutations in GNPT  
4       cause lysosomal storage disorders such as mucopolidoses. However, the molecular mechanism  
5       of GNPT remains unclear. Mammalian GNPTs are  $\alpha 2\beta 2\gamma 2$  hexamers in which the core  
6       catalytic  $\alpha$ - and  $\beta$ -subunits are derived from GNPTAB. Here, we present the cryo-electron  
7       microscopy structure of the *Drosophila melanogaster* GNPTAB homolog (DmGNPTAB).  
8       Four conserved regions located far apart in the sequence fold into the catalytic domain, which  
9       exhibits structural similarity to that of the UDP-glucose glycoprotein glucosyltransferase  
10      (UGGT). Comparison with UGGT revealed a putative donor substrate-binding site, and the  
11      functional requirements of critical residues in human GNPTAB were validated using  
12      GNPTAB-knockout cells. DmGNPTAB forms an evolutionarily conserved homodimer, and  
13      perturbing the dimer interface undermines the maturation and activity of human GNPTAB.  
14      These results provide important insights into GNPT function and related diseases.

## 1 **Introduction**

2 Protein phosphorylation is universally present as a regulatory strategy in eukaryotic cells.  
3 Glycan phosphorylation, though not as abundant, also plays essential roles in modulating  
4 cellular processes, particularly within the secretory compartments. For example, two novel  
5 secretory pathway glycan kinases have been recently characterized: the proteoglycan xylose  
6 kinase Fam20B regulates the biosynthesis of chondroitin sulfate and heparan sulfate  
7 proteoglycans (Koike et al., 2009; Wen et al., 2014; Zhang et al., 2018), and the protein O-  
8 mannose kinase POMK/SgK196 monitors the proper glycosylation of  $\alpha$ -dystroglycan  
9 (Walimbe et al., 2020; Yoshida-Moriguchi et al., 2013; Zhu et al., 2016).

10 A canonical glycan phosphorylation event involves ~60 secretory proteins that are  
11 destined for lysosomes. Similar to other secretory molecules, these lysosomal proteins are first  
12 synthesized in the endoplasmic reticulum and then traverse through the Golgi network. At the  
13 Golgi apparatus, these proteins are “phosphorylated” on a terminal mannose residue in their  
14 N-linked glycans, resulting in the formation of a mannose 6-phosphate (M6P) tag that is  
15 recognized by two specific M6P receptors to direct their lysosomal transport. Interestingly,  
16 this essential modification is not performed by an ATP-dependent kinase but is generated by  
17 the sequential action of two enzymes: first, the N-acetylglucosamine-1-phosphotransferase  
18 (GNPT) catalyzes the addition of an N-acetylglucosamine-1-phosphate (GlcNAc-1-P) group  
19 to the terminal mannose, and the GlcNAc-1-phosphodiester  $\alpha$ -N-acetylglucosaminidase  
20 (NAGPA) then removes the GlcNAc moiety to uncover M6P (Varki and Kornfeld, 2015).

21 Mammalian GNPTs are large protein complexes that comprise two  $\alpha$ -subunits, two  $\beta$ -  
22 subunits and two  $\gamma$ -subunits (Bao et al., 1996; Kudo and Canfield, 2006). The catalytic  $\alpha$ - and  
23  $\beta$ -subunits are first synthesized as GNPTAB fusion proteins. GNPTAB has a complex  
24 structural organization and includes two transmembrane (TM) segments, four conserved  
25 regions (CR1-CR4), two Notch repeats (N1 and N2), a DNA methyltransferase-associated  
26 protein (DMAP) interaction domain, and several spacer regions (S1-S4) (Figure 1A). The two  
27 TM segments anchor GNPTAB on the Golgi membrane and project most of the molecule into

1 the Golgi lumen. The four CRs are conserved in Stealth proteins, and members of this family  
2 can function as hexose-phosphate transferases in bacteria to synthesize cell wall  
3 polysaccharides (Sperisen et al., 2005). The Notch repeats and DMAP interaction domain  
4 mediate the interaction between GNPT and its diverse lysosomal protein substrates (Qian et  
5 al., 2013; Qian et al., 2015; van Meel et al., 2016). The spacer regions are also functionally  
6 important. For example, the S2 region is responsible for interacting with the  $\gamma$ -subunit (De  
7 Pace et al., 2015; Velho et al., 2016). S3 contains a recognition site for the site-1 protease,  
8 which cleaves GNPTAB into its  $\alpha$ - and  $\beta$ -subunits and thereby leads to catalytic activation  
9 (Marschner et al., 2011). The S1 spacer facilitates proper processing of GNPTAB by the site-1  
10 protease (Liu et al., 2017). S4 contains an EF-hand calcium-binding motif, but its function  
11 remains unclear. The  $\gamma$ -subunit is encoded by *GNPTG* and plays a regulatory function to  
12 promote the activity of the GNPT holoenzyme toward a subset of substrates (Qian et al.,  
13 2010).

14 More than 200 mutations in GNPTAB have been documented in patients with  
15 mucopolysaccharidoses, a group of human lysosomal storage disorders that include skeletal and  
16 neuronal abnormalities (summarized in Velho et al., 2019). Mutations in GNPTAB and  
17 GNPTG have also been linked to stuttering (Frigerio-Domingues and Drayna, 2017). On the  
18 other hand, GNPT might serve as a potential antiviral target because a number of viruses, such  
19 as the Ebola virus and the common cold coronaviruses OC43 and 229E, rely on the lysosomal  
20 pathway for infection and egress (Flint et al., 2019; Wang et al., 2021). However, the  
21 underlying molecular mechanism of GNPT remains insufficiently understood. Here, we  
22 sought to characterize the structural architecture of GNPT by cryo-electron microscopy (cryo-  
23 EM) and successfully determined the 3.5-Å structure of the *Drosophila melanogaster*  
24 GNPTAB. Our results reveal critical structural features that are conserved in the GNPTAB  
25 family. We then generated a *GNPTAB*-knockout cell line using the CRISPR-Cas9 genome  
26 editing technique and validated the importance of residues in human GNPTAB involved in  
27 donor substrate binding and dimerization. We also analyzed pathogenic missense mutations

1 and assessed their potential impacts. Together, our results advance the understanding of GNPT  
2 and related human diseases.

3

## 4 **Results**

### 5 **Cryo-EM structure of *Drosophila melanogaster* GNPT**

6 We sought to investigate the structural basis of GNPT function. Despite intensive  
7 attempts, we were unable to obtain the structure of the GNPT complex and could not  
8 determine the structure of the  $\alpha/\beta$  subcomplex or the GNPTAB precursor. *Drosophila*  
9 *melanogaster* has a GNPTAB homolog (DmGNPTAB) but lacks a discernable gene encoding  
10 GNPTG (Sperisen et al., 2005; Tiede et al., 2005). The DmGNPTAB protein is markedly  
11 more compact than its human counterpart (Figure 1A). Specifically, this protein contains all  
12 four CRs and a similar CR3-CR4 spacer but has shorter CR1-CR2 and CR2-CR3 spacers, only  
13 one Notch repeat, and lacks the DMAP interaction domain and S1P cleavage site (Figure 1A,  
14 Figure S1). We obtained the luminal portion of DmGNPTAB and analyzed its structure by  
15 cryo-EM (Figure 1B, Figure S2). The structure was determined at an overall resolution of 3.5  
16 Å (Table S1). The center region displayed high resolutions, which allowed us to build the  
17 structural model de novo. Approximately half of the protein molecule, including all four CRs  
18 and the CR3-CR4 spacer, could be confidently placed. The amino and carboxyl termini are  
19 located on the same side of a monomer, which sheds light on the topology of the full-length  
20 protein on the Golgi membrane (Figure 1C). The rest of the molecule, particularly the CR2-  
21 CR3 spacer including the Notch repeat, displayed weak densities and was thus not modeled.

22

### 23 **Structure of the DmGNPTAB monomer**

24 Two domains are clearly visible in the DmGNPTAB monomer (Figure 2A). The large  
25 domain, which is referred to as the Stealth domain, features an  $\alpha/\beta$  fold that includes all four  
26 Stealth CRs. CR1 contains a  $\beta$ -strand that occupies the center of the Stealth domain. CR2  
27 comprises three  $\beta$ -strands and two  $\alpha$ -helices. The three strands sandwich the CR1 strand in a

1 parallel manner to form a  $\beta$ -sheet, whereas the two helices are situated on each side of the  
2 sheet. CR3 consists of one strand and three helices. The single CR3 strand runs antiparallel to  
3 the four strands described above, and the three helices bundle together with the short helix in  
4 CR2. CR4 features a single helix, which packs against the long helix in CR2. The small  
5 domain is encoded by the CR3-CR4 spacer, including the calcium-binding EF hand motif, and  
6 features a helix bundle to mediate dimerization.

7 The four Stealth CRs, which are located far apart in the sequence, fold into a single  
8 globular domain. The Stealth domain shows structural similarities to several GT-A-type  
9 glycosyltransferases (Lairson et al., 2008) despite low sequence homology (Figure S3A). In  
10 particular, this domain exhibits structural resemblance to UDP-glucose glycoprotein  
11 glucosyltransferase (UGGT), particularly at the central  $\beta$ -sheet region (Figure S3B). UGGT is  
12 an ER-resident protein that surveils the folding status of secretory glycoproteins (Braakman  
13 and Bulleid, 2011). Similar to GNPT, UGGT is a label marker, and the labeling of UGGT also  
14 occurs on the terminal mannose of an N-linked glycan. Instead of labeling proteins that are  
15 destined for lysosomes, UGGT labels proteins that are incompletely folded: specifically, it  
16 recognizes misfolded glycoproteins and transfers a glucose residue to the terminal mannose on  
17 the glycan of these proteins, and this modification is recognized by ER chaperones, including  
18 calnexin and calreticulin, to facilitate correct folding.

19 Crystal structures of UGGT homologs from several thermophilic fungi have been  
20 determined (Roversi et al., 2017; Satoh et al., 2017). A structural comparison between the  
21 Stealth domain of DmGNPTAB and the catalytic domain of *Thermomyces dupontii* UGGT  
22 (TdUGGT) in complex with UDP-glucose offers a glimpse into the sugar nucleotide-binding  
23 site of GNPT. UDP-glucose binds to the surface pocket of TdUGGT (Figure S3B).  
24 DmGNPTAB has a similar surface pocket, which is formed by a group of conserved residues,  
25 including Thr69 from CR1; Ser156, Ile159, Glu160, Tyr175, Asn177, Asp178, and Asp179  
26 from CR2; His375, Phe378, Arg405, and Gln411 from CR3; Phe546 and Met548 from the  
27 CR3-CR4 spacer; and Cys572, Asn574, and Asn576 from CR4 (Figure 2A). The functional

1 importance of these residues is underscored by the fact that missense mutations of a number of  
2 the corresponding human residues have been found in patients (see Discussion). It is likely  
3 that the donor substrate UDP-GlcNAc is accommodated in DmGNPTAB in an orientation  
4 similar to that of UDP-glucose in TdUGGT, with the left side of the pocket enclosing the  
5 uridine diphosphate moiety and the right side holding the N-acetylglucosamine group (Figure  
6 S3B). A Ca<sup>2+</sup> ion facilitates the accommodation of UDP-glucose in TdUGGT and is  
7 coordinated by three Asp residues, including Asp1294 and Asp1296 in the Asp-X-Asp  
8 signature motif of GT-A glycosyltransferases and Asp1427 (Figure S3C). A well-conserved  
9 Asn177-Asp178-Asp179 motif in CR2 of DmGNPTAB aligns with the Asp-X-Asp motif in  
10 TdUGGT, whereas Cys572 appears to take the position of TdUGGT-Asp1427. It is thus likely  
11 that these residues are also involved in the binding to a divalent cation that assists in  
12 positioning the UDP-GlcNAc in DmGNPTAB.

13

#### 14 **Human GNPTAB mutants are functionally defective**

15 We sought to validate the functional importance of some of these residues in human  
16 GNPTAB. To unambiguously analyze the activities of various GNPTAB mutants, we first  
17 generated a *GNPTAB*-knockout (*GNPTAB*<sup>-/-</sup>) HeLa cell line using the CRISPR/Cas9 genome-  
18 editing technique (Figure S4). Consistent with previous observations (van Meel et al., 2016),  
19 *GNPTAB*<sup>-/-</sup> cells exhibited markedly swollen lysosomes compared with the parental cells  
20 (Figure 2B), which indicated that lysosomal function is severely impaired in these cells. As a  
21 result of lysosomal dysfunction, the lysosomal cysteine protease cathepsin B (CatB) was not  
22 properly processed, and the mature form of endogenous CatB at ~30 kDa was not detected in  
23 the lysates of *GNPTAB*<sup>-/-</sup> cells (Figure 3C). This finding was also consistent with previous  
24 observations obtained with GNPTAB-deficient HAP1 cells (Flint et al., 2019). We then  
25 generated alanine substitutions of Asn406, Asp408, and Cys1149, which are equivalent to  
26 Asn177, Asp179, and Cys572 in DmGNPTAB that form the putative metal-binding site  
27 (Figure S1, Figure S3C), and examined the abilities of these mutants to rescue CatB

1 maturation. As expected, the expression of wild-type (WT) GNPTAB restored the mature  
2 form of CatB (Figure 2D). In contrast, N406A, D408A, and C1149A displayed reduced  
3 activities compared with the WT protein, and D408A appeared to be completely inactive.  
4 These results demonstrate the importance of these residues for GNPT function, corroborating  
5 our structural analyses.

## 7 **A conserved dimeric architecture**

8 Mammalian GNPTs are  $\alpha 2\beta 2\gamma 2$  hexameric complexes, and the construction of the  
9 hexamer remains poorly understood. In our structure, two DmGNPTAB molecules form a  
10 homodimer that resembles two fishes nestling against each other in a head-to-tail orientation  
11 (Figure 1B). The dimer is mainly mediated by the CR3-CR4 spacer and CR4, whose  
12 counterparts both reside in the  $\beta$ -subunit of human GNPT (Figure 1A). A few residues in CR2  
13 also contribute to dimer formation. The dimer interface buries  $\sim 1,500\text{-}\text{\AA}^2$  solvent-accessible  
14 surfaces from each molecule and involves a number of invariant residues (Figure S1), which  
15 suggests that the dimerization mechanism observed in this study is likely generally conserved  
16 in the GNPTAB family.

17 To verify the functional relevance of the dimer, we generated two human GNPTAB  
18 mutants: G1 (T1019N/D1020G/Q1021S) and G2 (T1035N/R1036G/I1037S). These two  
19 mutants were designed to create sites that allow the attachment of N-linked glycans. Thr1019  
20 and Thr1035 in human GNPTAB correspond to Thr438 and Thr454 in DmGNPTAB, both of  
21 which are located in the dimer interface (Figure 3A). The introduction of bulky glycans at  
22 these positions would impede dimerization of the human protein. We tagged these mutants  
23 with Flag tags at the C-terminus, co-expressed them with V5-tagged WT GNPTAB in  
24 HEK293T cells, and performed Flag immunoprecipitation. Flag-tagged and V5-tagged WT  
25 GNPTAB proteins were efficiently coprecipitated (Figure 3B), which indicated the formation  
26 of GNPTAB dimers in the cells. In contrast, the interactions between G1 or G2 and WT  
27 GNPTAB were markedly reduced, which suggested that these two mutants exhibit decreased



1 abilities to dimerize with the WT protein. Furthermore, unlike WT GNPTAB, these two  
2 mutants were not efficiently processed because the ~48-kDa band that corresponds to the  $\beta$ -  
3 subunit was not observed after their expression (Figure 3B). Importantly, these mutations  
4 could also not fully rescue the maturation of CatB in *GNPTAB*<sup>-/-</sup> cells (Figure 2D). Together,  
5 these results demonstrated that proper dimer formation is important for the processing of  
6 GNPTAB and for the activity of the GNPT holoenzyme.

7

## 8 **Discussion**

9 More than 200 mutations in GNPTAB, including at least 65 missense mutations, have  
10 been detected in patients with various forms of mucopolysaccharidoses (Velho et al., 2019). The effects  
11 of some of these mutations have been characterized biochemically, but the structure of human  
12 GNPTAB has remained elusive despite its long research history. The structure of  
13 DmGNPTAB allows extrapolation of the core structure of human GNPT and can thus be used  
14 to further assess the molecular impacts of disease-causing mutations (Figure 4). For example,  
15 the human GNPTAB residues Ser385, Glu389, Asp407, Asp408, His956, Arg986, and  
16 Asn1153 correspond to Ser156, Glu160, Asp178, Asp179, His375, Arg405, and Asn576 in  
17 DmGNPTAB (Figure 4A), all of which are found among the sugar nucleotide-binding pockets  
18 described above (Figure 2A). Thus, their mutations likely affected the binding of UDP-  
19 GlcNAc, consistent with the findings from previous studies showing that missense mutations  
20 involving these sites, such as S385L, E389K, D407A, D408N, H956Y, R986C, and N1153,  
21 resulted in markedly decreased enzyme activities (Danyukova et al., 2020; Ludwig et al.,  
22 2017; Qian et al., 2015). We also showed that D408A was unable to restore the maturation of  
23 CatB in *GNPTAB*<sup>-/-</sup> cells (Figure 2D). Another set of mutants, including W81L, R334Q and  
24 R334L, S399F, I403T, and D1018G, displayed defects in exit from the ER, which indicated  
25 protein misfolding (Qian et al., 2015). These sites were also conserved in DmGNPTAB  
26 (Trp70, Arg105, Ser170, Leu174, and Asp437; Figure 4A). Trp70 and Leu174 are both  
27 present in the interior of the structure and are intimately packed with surrounding hydrophobic

1 residues. Arg105 forms a bidentate interaction with Glu607 to support Pro601, which is  
2 involved in dimerization. Ser170 likely forms hydrogen bond interactions with Asp65 and  
3 Arg115, and the corresponding human residues, Asp76 and Arg344, are also mutated in some  
4 patients (Figure 4A). Similarly, some of the other mutations also lead to structural disturbance  
5 of human GNPT, as can be rationalized by the DmGNPTAB structure.

6 Human GNPT is an  $\alpha_2\beta_2\gamma_2$  hexamer. The DmGNPTAB structure reveals a dimeric  
7 framework that sheds light on the assembly mechanism of human GNPT. The CR3-CR4  
8 spacer and CR4 play dominant roles in mediating the formation of the DmGNPTAB  
9 homodimer, which likely reflects how the  $\beta_2$  dimer is formed in GNPT because most of the  
10 residues involved in the dimer interface are conserved (Figure S1) and because mutations of  
11 two of these residues reduced human GNPTAB dimerization (Figure 3B). In addition to the  
12 interactions between  $\beta$ -subunits, Cys70 in human GNPTAB is involved in disulfide-linked  
13 homodimerization of the  $\alpha$ -subunits (De Pace et al., 2015). Cys61 in DmGNPTAB appears to  
14 align with Cys70, and in the DmGNPTAB dimer, two Cys61 residues from the two monomers  
15 are located in close proximity (Figure 3A), which suggests that a disulfide bond between the  
16 corresponding Cys70s could be readily formed to further stabilize the  $\alpha_2\beta_2$  subcomplex. The  
17  $\gamma$ -subunit also forms a disulfide-linked homodimer (Kudo and Canfield, 2006), and only a  $\gamma_2$   
18 dimer can be assembled into the GNPT holoenzyme (Encarnacao et al., 2011). The  $\gamma_2$  dimer,  
19 through its interactions with the S2 spacers in the two  $\alpha$ -subunits, supplies another layer of  
20 interaction to architect the  $\alpha_2\beta_2\gamma_2$  hexamer.

21 The most critical issue regarding the molecular mechanism of GNPT, namely, its specific  
22 targeting of 60 lysosomal proteins among thousands of glycoproteins that traverse the Golgi  
23 apparatus, remains to be addressed. We were unable to model the sole Notch repeat domain in  
24 DmGNPTAB due to its weak density, which indicates its structural flexibility in the absence  
25 of a cognate acceptor substrate. The  $\alpha$ -subunit of human GNPT contains two Notch repeats  
26 and a DMAP interaction domain, all of which are involved in binding to lysosomal proteins,  
27 although their relative contribution differs among each individual substrate (Qian et al., 2015;

1 van Meel et al., 2016). Furthermore, the  $\gamma$ -subunit, which is absent in *Drosophila* and contains  
2 an M6P receptor homology domain and another DMAP interaction domain, also plays an  
3 important role in the activity of GNPT toward select lysosomal proteins (Qian et al., 2010). It  
4 is apparent that starting from an ancestral Stealth gene, GNPTAB family proteins have gained  
5 increasing complexity in eukaryotes and even obtained additional interacting partners in  
6 vertebrates to ensure the proper transport of lysosomal proteins.

7 In summary, we have elucidated the structure of DmGNPT, and our findings offer a more  
8 in-depth understanding of the function of human GNPTAB and provide molecular insights  
9 into the pathogenesis of human mucopolisaccharidoses caused by GNPTAB mutations.

10

## 1 **Materials and Methods**

### 2 **Protein expression and purification**

3 The *Drosophila melanogaster* *GNPTAB* gene (CG8027) was cloned from a fly cDNA  
4 library. The DNA fragment encoding DmGNPTAB residues 50-630 was cloned into the  
5 psMBP2 vector (Tagliabracci et al., 2016), which facilitates its expression in insect cells as a  
6 secreted His6-MBP fusion protein with a tobacco etch virus (TEV) protease cleavage site.  
7 Bacmids were generated in DH10Bac cells using the Bac-to-Bac system (Invitrogen). Sf21  
8 insect cells grown in SIM SF medium (Sino Biological Inc.) were used to generate and  
9 amplify the baculoviruses. For protein production, Hi5 cells grown in SIM HF medium (Sino  
10 Biological Inc.) were infected at a density of  $1.5\text{--}2.0 \times 10^6$  cells/ml. Forty-eight hours later,  
11 conditioned media were collected by centrifugation at 2,000 g for 30 min. The media were  
12 then concentrated using a Hydrosart Ultrafilter (Sartorius) and transferred into binding buffer  
13 containing 25 mM Tris-HCl, pH 8.0, and 150 mM NaCl. The recombinant protein was then  
14 isolated using Ni-NTA resin (GE healthcare) and eluted with a buffer containing 25 mM Tris-  
15 HCl, pH 8.0, 150 mM NaCl, and 500 mM imidazole. After TEV protease digestion for 10 h at  
16 4°C to remove the N-terminal His6-MBP tag, the protein mixture was transferred into a buffer  
17 containing 25 mM Tris-HCl, pH 8.0, and 50 mM NaCl using a Centricon with a cutoff of 10  
18 kDa (Millipore). The untagged proteins were then purified by anion exchange chromatography  
19 (Resource Q) and eluted using a 50–1000 mM NaCl salt gradient in 25 mM Tris-HCl, pH 8.0,  
20 followed by size exclusion chromatography (Superdex Increase 200) and elution in 25 mM  
21 HEPES, pH 7.5, and 150 mM NaCl.

22

### 23 **Cryo-EM data collection, model building and structure analyses**

24 Four-microliter aliquots of purified DmGNPTAB at 0.5 mg/ml were applied onto glow-  
25 discharged Quantifoil holey-carbon grids (R1.2/1.3, 300 mesh, gold), blotted at 4 °C in 100%  
26 humidity, and plunged into liquid ethane with a Vitrobot Mark IV (FEI). The cryogrids were  
27 screened with a 200-kV Talos Arctica microscope. Data collection was performed with a 300-

1 kV Titan Krios G3 microscope equipped with a Gatan GIF Quantum K2 Summit direct  
2 electron detector using SerialEM (Mastronarde, 2005). The statistics for data collection and  
3 processing are summarized in Table S1.

4 Movie frames were aligned with MotionCor2 (Zheng et al., 2017). The CTF parameters  
5 were estimated using Gctf (v1.063) (Zhang, 2016). Micrographs were sorted based on image  
6 qualities, and 14,345 micrographs were used for subsequent reconstruction with Relion  
7 (v3.07) (Zivanov et al., 2018). Particles were autopicked based on the templates generated by  
8 manual picking and subjected to 2D classification. Classes showing clear structural details  
9 were then used to create an initial model. 3D classifications with C1 symmetry were first  
10 performed, and 544,196 particles with good structural features were selected for further 3D  
11 classifications using C2 symmetry. A total of 131,301 particles were then selected for 3D  
12 refinement, which resulted in a map with an overall resolution of 3.53 Å after Bayesian  
13 polishing and CTF refinement. The resolution was estimated using the gold-standard Fourier  
14 shell correlation (FSC) 0.143 criteria.

15 The structure of DmGNPTAB was built de novo in Coot (Emsley et al., 2010). Bulky  
16 aromatic residues and N-linked glycosylation sites were used as landmarks during the  
17 structural modeling process. Structure refinement was performed using real-space refinement  
18 in Phenix (v1.18) (Adams et al., 2010). A structural homology search was performed using the  
19 DALI server (Holm, 2020). Figures were prepared with ESPript (Gouet et al., 2003), PyMOL  
20 (Schrödinger), and UCSF Chimera (Pettersen et al., 2004).

21

## 22 **Generation and characterization of *GNPTAB*<sup>-/-</sup> HeLa cells**

23 HeLa cells were grown in Dulbecco's modified Eagle's medium (DMEM) supplemented  
24 with 10% (v/v) fetal bovine serum (FBS) at 37°C in a 5% CO<sub>2</sub> incubator. *GNPTAB*<sup>-/-</sup> cells  
25 were generated using CRISPR/Cas9 technology. The guide RNA, 5'-  
26 ACAAACATGGTATTGATCT-3', which targets exon 2 of *GNPTAB*, was cloned into the  
27 pSpCas9(BB)-2A-GFP vector (Addgene, 48138). Three micrograms of the plasmid was then

1 transfected into HeLa cells using Lipofectamine 2000 (Thermo Scientific). Two days after  
2 transfection, GFP-positive cells were sorted into single clones using an Astrios EQ cell sorter  
3 (Beckman Coulter). Single clones were cultured in 96-well plates for two weeks. The genome  
4 type of the knockout cells was determined by DNA sequencing.

5 For the visualization of lysosomes, parental and *GNPTAB*<sup>-/-</sup> HeLa cells were fixed with  
6 4% paraformaldehyde in phosphate-buffered saline (PBS) at room temperature for 15 min,  
7 permeabilized with PBS containing 0.1% saponin and 2% bovine serum albumin, and then  
8 incubated with anti-LAMP1 antibody (Santa Cruz, sc-20011, 1:50) at 4°C overnight. The next  
9 day, the cells were washed with PBS and incubated with Alexa Fluor 488 donkey anti-mouse  
10 antibody (Invitrogen, A21202, 1:150) for 1 h at 25°C. The coverslips containing the cells were  
11 then re-washed with PBS, incubated with DAPI for the visualization of nuclei, and examined  
12 with a Delta Vision microscope. The images were analyzed using Velocity (v6.1.1) software.

13 To examine the maturation of CatB, WT and mutant *GNPTAB*-Flag plasmids were  
14 transfected into *GNPTAB*<sup>-/-</sup> HeLa cells as indicated. Seventy-two hours later, the cells were  
15 harvested, washed with PBS, lysed in lysis buffer (PBS supplemented with 0.5% Triton X-  
16 100, 1% protease inhibitor cocktail, and 1 mM phenylmethylsulfonyl fluoride) for 15 min at  
17 4°C, and analyzed by western blotting.

## 18

### 19 **Immunoprecipitation and western blotting**

20 The human *GNPTAB* gene was cloned into modified pcDNA 3.1 vectors that encode a C-  
21 terminal Flag or V5 tag. Mutations were generated using a PCR-based method and verified by  
22 sequencing. For the immunoprecipitation experiments, V5-tagged *GNPTAB* was  
23 cotransfected with Flag-tagged *GNPTAB* into HEK293T cells in 10-cm dishes using  
24 polyethyleneimine. Forty-eight hours later, the cells were harvested, washed with PBS, and  
25 lysed in lysis buffer. The lysates were then centrifuged for 15 min at 13,000 g, and the  
26 supernatant was incubated with Flag M2 beads (Sigma, A2220) for 2 h at 4°C. The beads were

1 washed three times with lysis buffer. The immunoprecipitated proteins were eluted from the  
2 beads using the 3X Flag peptide (NJPeptide, NJP50002) and analyzed by western blotting.

3 For the western blot analyses, protein samples separated by SDS-PAGE were transferred  
4 to nitrocellulose membranes, and the membranes were then blocked with 4% nonfat milk for  
5 30 min at 25°C and incubated with primary antibody overnight at 4°C. The next day, the  
6 membranes were incubated with HRP-conjugated secondary antibodies in 4% nonfat milk for  
7 1 h at room temperature. Detections were performed by enhanced chemiluminescence using  
8 an Amersham Imager 800. The primary antibodies used for immunoblotting were anti-Flag  
9 (ABclonal, AE005, 1:1000), anti-Flag (MBL, PM020, 1:1000), anti-V5 (Santa Cruz, sc-  
10 81594, 1:1000), anti-V5 (Millipore, AB3792, 1:1000), anti-CatB (Cell Signaling, 31718,  
11 1:1000), and anti-GAPDH (TransGen, HC301-02, 1:5000). The secondary antibodies were  
12 goat anti-mouse (TransGen, HS201-01, 1:5000) and goat anti-rabbit (TransGen, HS101-01,  
13 1:5000).

14

## 1 **References**

- 2 Adams, P.D., Afonine, P.V., Bunkóczi, G., Chen, V.B., Davis, I.W., Echols, N., Headd, J.J.,  
3 Hung, L.W., Kapral, G.J., Grosse-Kunstleve, R.W., *et al.* (2010). PHENIX: A comprehensive  
4 Python-based system for macromolecular structure solution. *Acta Crystallographica Section*  
5 *D: Biological Crystallography* *66*, 213-221.
- 6 Bao, M., Booth, J.L., Elmendorf, B.J., and Canfield, W.M. (1996). Bovine UDP-N-  
7 acetylglucosamine:lysosomal-enzyme N-acetylglucosamine-1-phosphotransferase. I.  
8 Purification and subunit structure. *J Biol Chem* *271*, 31437-31445.
- 9 Braakman, I., and Bulleid, N.J. (2011). Protein folding and modification in the mammalian  
10 endoplasmic reticulum. *Annu Rev Biochem* *80*, 71-99.
- 11 Danyukova, T., Ludwig, N.F., Velho, R.V., Harms, F.L., Gunes, N., Tidow, H., Schwartz,  
12 I.V., Tuysuz, B., and Pohl, S. (2020). Combined in vitro and in silico analyses of missense  
13 mutations in GNPTAB provide new insights into the molecular bases of mucopolidosis II and  
14 III alpha/beta. *Hum Mutat* *41*, 133-139.
- 15 De Pace, R., Velho, R.V., Encarnacao, M., Marschner, K., Braulke, T., and Pohl, S. (2015).  
16 Subunit interactions of the disease-related hexameric GlcNAc-1-phosphotransferase complex.  
17 *Hum Mol Genet* *24*, 6826-6835.
- 18 Emsley, P., Lohkamp, B., Scott, W.G., and Cowtan, K. (2010). Features and development of  
19 Coot. *Acta Crystallographica Section D: Biological Crystallography* *66*, 486-501.
- 20 Encarnacao, M., Kollmann, K., Trusch, M., Braulke, T., and Pohl, S. (2011). Post-  
21 translational modifications of the gamma-subunit affect intracellular trafficking and complex  
22 assembly of GlcNAc-1-phosphotransferase. *J Biol Chem* *286*, 5311-5318.
- 23 Flint, M., Chatterjee, P., Lin, D.L., McMullan, L.K., Shrivastava-Ranjan, P., Bergeron, E., Lo,  
24 M.K., Welch, S.R., Nichol, S.T., Tai, A.W., *et al.* (2019). A genome-wide CRISPR screen  
25 identifies N-acetylglucosamine-1-phosphate transferase as a potential antiviral target for Ebola  
26 virus. *Nat Commun* *10*, 285.



- 1 Frigerio-Domingues, C., and Drayna, D. (2017). Genetic contributions to stuttering: the  
2 current evidence. *Mol Genet Genomic Med* 5, 95-102.
- 3 Gouet, P., Robert, X., and Courcelle, E. (2003). ESPript/ENDscript: Extracting and rendering  
4 sequence and 3D information from atomic structures of proteins. *Nucleic Acids Res* 31, 3320-  
5 3323.
- 6 Holm, L. (2020). DALI and the persistence of protein shape. *Protein Sci* 29, 128-140.
- 7 Koike, T., Izumikawa, T., Tamura, J., and Kitagawa, H. (2009). FAM20B is a kinase that  
8 phosphorylates xylose in the glycosaminoglycan-protein linkage region. *Biochem J* 421, 157-  
9 162.
- 10 Kudo, M., and Canfield, W.M. (2006). Structural requirements for efficient processing and  
11 activation of recombinant human UDP-N-acetylglucosamine:lysosomal-enzyme-N-  
12 acetylglucosamine-1-phosphotransferase. *J Biol Chem* 281, 11761-11768.
- 13 Lairson, L.L., Henrissat, B., Davies, G.J., and Withers, S.G. (2008). Glycosyltransferases:  
14 structures, functions, and mechanisms. *Annu Rev Biochem* 77, 521-555.
- 15 Liu, L., Lee, W.S., Doray, B., and Kornfeld, S. (2017). Role of spacer-1 in the maturation and  
16 function of GlcNAc-1-phosphotransferase. *FEBS Lett* 591, 47-55.
- 17 Ludwig, N.F., Velho, R.V., Sperb-Ludwig, F., Acosta, A.X., Ribeiro, E.M., Kim, C.A.,  
18 Gandelman Horovitz, D.D., Boy, R., Rodovalho-Doriqui, M.J., Lourenco, C.M., *et al.* (2017).  
19 GNPTAB missense mutations cause loss of GlcNAc-1-phosphotransferase activity in  
20 mucopolipidosis type II through distinct mechanisms. *Int J Biochem Cell Biol* 92, 90-94.
- 21 Marschner, K., Kollmann, K., Schweizer, M., Braulke, T., and Pohl, S. (2011). A key enzyme  
22 in the biogenesis of lysosomes is a protease that regulates cholesterol metabolism. *Science*  
23 333, 87-90.
- 24 Mastronarde, D.N. (2005). Automated electron microscope tomography using robust  
25 prediction of specimen movements. *J Struct Biol* 152, 36-51.

- 1 Pettersen, E.F., Goddard, T.D., Huang, C.C., Couch, G.S., Greenblatt, D.M., Meng, E.C., and  
2 Ferrin, T.E. (2004). UCSF Chimera--a visualization system for exploratory research and  
3 analysis. *J Comput Chem* 25, 1605-1612.
- 4 Qian, Y., Flanagan-Steet, H., van Meel, E., Steet, R., and Kornfeld, S.A. (2013). The DMAP  
5 interaction domain of UDP-GlcNAc:lysosomal enzyme N-acetylglucosamine-1-  
6 phosphotransferase is a substrate recognition module. *Proc Natl Acad Sci U S A* 110, 10246-  
7 10251.
- 8 Qian, Y., Lee, I., Lee, W.S., Qian, M., Kudo, M., Canfield, W.M., Lobel, P., and Kornfeld, S.  
9 (2010). Functions of the alpha, beta, and gamma subunits of UDP-GlcNAc:lysosomal enzyme  
10 N-acetylglucosamine-1-phosphotransferase. *J Biol Chem* 285, 3360-3370.
- 11 Qian, Y., van Meel, E., Flanagan-Steet, H., Yox, A., Steet, R., and Kornfeld, S. (2015).  
12 Analysis of mucopolidosis II/III GNPTAB missense mutations identifies domains of UDP-  
13 GlcNAc:lysosomal enzyme GlcNAc-1-phosphotransferase involved in catalytic function and  
14 lysosomal enzyme recognition. *J Biol Chem* 290, 3045-3056.
- 15 Roversi, P., Marti, L., Caputo, A.T., Alonzi, D.S., Hill, J.C., Dent, K.C., Kumar, A.,  
16 Levasseur, M.D., Lia, A., Waksman, T., *et al.* (2017). Interdomain conformational flexibility  
17 underpins the activity of UGGT, the eukaryotic glycoprotein secretion checkpoint. *Proc Natl*  
18 *Acad Sci U S A* 114, 8544-8549.
- 19 Satoh, T., Song, C., Zhu, T., Toshimori, T., Murata, K., Hayashi, Y., Kamikubo, H.,  
20 Uchihashi, T., and Kato, K. (2017). Visualisation of a flexible modular structure of the ER  
21 folding-sensor enzyme UGGT. *Sci Rep* 7, 12142.
- 22 Sperisen, P., Schmid, C.D., Bucher, P., and Zilian, O. (2005). Stealth proteins: in silico  
23 identification of a novel protein family rendering bacterial pathogens invisible to host immune  
24 defense. *PLoS Comput Biol* 1, e63.
- 25 Tagliabracci, V.S., Wen, J., and Xiao, J. (2016). Methods to Purify and Assay Secretory  
26 Pathway Kinases. *Methods Mol Biol* 1496, 197-215.

- 1 Tiede, S., Storch, S., Lubke, T., Henrissat, B., Bargal, R., Raas-Rothschild, A., and Braulke,  
2 T. (2005). Mucopolidosis II is caused by mutations in GNPTA encoding the alpha/beta  
3 GlcNAc-1-phosphotransferase. *Nat Med* *11*, 1109-1112.
- 4 van Meel, E., Lee, W.S., Liu, L., Qian, Y., Doray, B., and Kornfeld, S. (2016). Multiple  
5 Domains of GlcNAc-1-phosphotransferase Mediate Recognition of Lysosomal Enzymes. *J*  
6 *Biol Chem* *291*, 8295-8307.
- 7 Varki, A., and Kornfeld, S. (2015). P-Type Lectins. In *Essentials of Glycobiology*, rd, A.  
8 Varki, R.D. Cummings, J.D. Esko, P. Stanley, G.W. Hart, M. Aebi, A.G. Darvill, T.  
9 Kinoshita, N.H. Packer, *et al.*, eds. (Cold Spring Harbor (NY)), pp. 423-433.
- 10 Velho, R.V., De Pace, R., Tidow, H., Braulke, T., and Pohl, S. (2016). Identification of the  
11 interaction domains between alpha- and gamma-subunits of GlcNAc-1-phosphotransferase.  
12 *FEBS Lett* *590*, 4287-4295.
- 13 Velho, R.V., Harms, F.L., Danyukova, T., Ludwig, N.F., Friez, M.J., Cathey, S.S., Filocamo,  
14 M., Tappino, B., Gunes, N., Tuysuz, B., *et al.* (2019). The lysosomal storage disorders  
15 mucopolidosis type II, type III alpha/beta, and type III gamma: Update on GNPTAB and  
16 GNPTG mutations. *Hum Mutat* *40*, 842-864.
- 17 Walimbe, A.S., Okuma, H., Joseph, S., Yang, T., Yonekawa, T., Hord, J.M., Venzke, D.,  
18 Anderson, M.E., Torelli, S., Manzur, A., *et al.* (2020). POMK regulates dystroglycan function  
19 via LARGE1-mediated elongation of matriglycan. *Elife* *9*.
- 20 Wang, R., Simoneau, C.R., Kulsuptrakul, J., Bouhaddou, M., Travisano, K.A., Hayashi, J.M.,  
21 Carlson-Stevermer, J., Zengel, J.R., Richards, C.M., Fozouni, P., *et al.* (2021). Genetic  
22 Screens Identify Host Factors for SARS-CoV-2 and Common Cold Coronaviruses. *Cell* *184*,  
23 106-119 e114.
- 24 Wen, J., Xiao, J., Rahdar, M., Choudhury, B.P., Cui, J., Taylor, G.S., Esko, J.D., and Dixon,  
25 J.E. (2014). Xylose phosphorylation functions as a molecular switch to regulate proteoglycan  
26 biosynthesis. *Proc Natl Acad Sci U S A* *111*, 15723-15728.

- 1 Yoshida-Moriguchi, T., Willer, T., Anderson, M.E., Venzke, D., Whyte, T., Muntoni, F., Lee,  
2 H., Nelson, S.F., Yu, L., and Campbell, K.P. (2013). SGK196 is a glycosylation-specific O-  
3 mannose kinase required for dystroglycan function. *Science* *341*, 896-899.
- 4 Zhang, H., Zhu, Q., Cui, J., Wang, Y., Chen, M.J., Guo, X., Tagliabracci, V.S., Dixon, J.E.,  
5 and Xiao, J. (2018). Structure and evolution of the Fam20 kinases. *Nat Commun* *9*, 1218.
- 6 Zhang, K. (2016). Gctf: Real-time CTF determination and correction. *J Struct Biol* *193*, 1-12.
- 7 Zheng, S.Q., Palovcak, E., Armache, J.P., Verba, K.A., Cheng, Y., and Agard, D.A. (2017).  
8 MotionCor2: anisotropic correction of beam-induced motion for improved cryo-electron  
9 microscopy. *Nat Methods* *14*, 331-332.
- 10 Zhu, Q., Venzke, D., Walimbe, A.S., Anderson, M.E., Fu, Q., Kinch, L.N., Wang, W., Chen,  
11 X., Grishin, N.V., Huang, N., *et al.* (2016). Structure of protein O-mannose kinase reveals a  
12 unique active site architecture. *Elife* *5*, e22238.
- 13 Zivanov, J., Nakane, T., Forsberg, B.O., Kimanius, D., Hagen, W.J., Lindahl, E., and Scheres,  
14 S.H. (2018). New tools for automated high-resolution cryo-EM structure determination in  
15 RELION-3. *Elife* *7*.

16

17

## 1 **Acknowledgments**

2 We thank the Core Facilities at the School of Life Sciences, Peking University for help with  
3 negative-staining EM; the Cryo-EM Platform of Peking University for help with data  
4 collection; the High-performance Computing Platform of Peking University for help with  
5 computation; the National Center for Protein Sciences at Peking University for assistance with  
6 cell sorting. The work was supported by the National Key Research and Development  
7 Program of China (2020YFC0848700 and 2017YFA0505200 to J.X., 2019YFA0508904 to  
8 N.G.), the National Science Foundation of China (31822014 to J.X., 31725007 and 31630087  
9 to N.G.), and the Qidong-SLS Innovation Fund to J.X. and N.G..

10

11 **Author contributions:** S.D. performed most of the experiments. S.D. and G.W. prepared the  
12 cryo-EM sample, collected data, and processed cryo-EM images under the supervision of N.G.  
13 and J.X. J.X. built the structural model, analyzed the data, and wrote the manuscript with  
14 inputs from all authors.

15

16 **Competing interests:** The authors declare no competing financial interests.

17

18 **Data and materials availability:** The cryo-EM map and atomic coordinates of DmGNPTAB  
19 have been deposited in the EMDB and PDB with accession codes EMD-30910 and 7DXI,  
20 respectively.

21

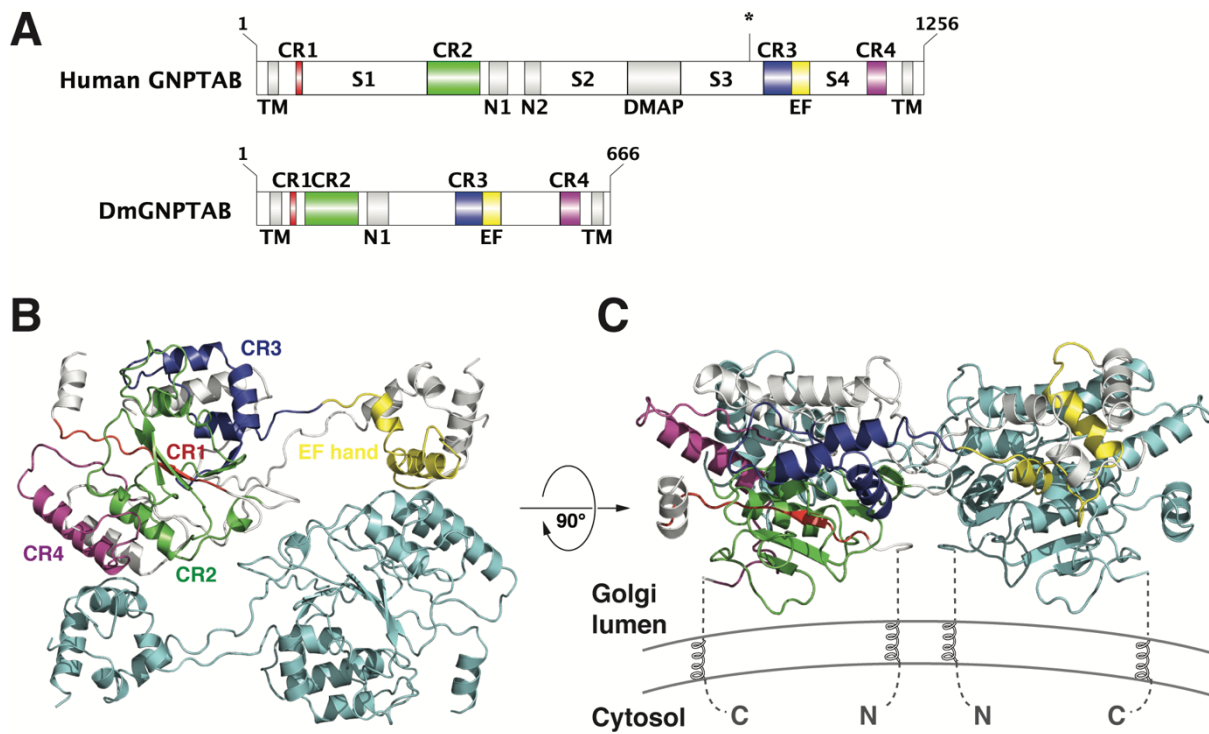

1  
2 **Figure 1. Cryo-EM structure of DmGNPTAB.**

3 **A.** Domain architectures of human GNPTAB and DmGNPTAB. TM: transmembrane  
4 segment; CR1-CR4: conserved regions in the Stealth proteins; N1 and N2: Notch repeats;  
5 DMAP: DNA methyltransferase-associated protein interaction domain; S1-S4: spacer regions.  
6 The asterisk indicates the S1P cleavage site in human GNPTAB.

7 **B.** Ribbon diagram of the DmGNPTAB structural model. The four CRs and EF hand motif in  
8 one protomer are depicted in red, green, blue, magenta, and yellow, respectively; whereas the  
9 rest of this protomer is shown in white. The other protomer is shown in cyan.

10 **C.** Putative model of DmGNPTAB on the Golgi membrane. The N- and C-termini of each  
11 molecule are indicated.

12

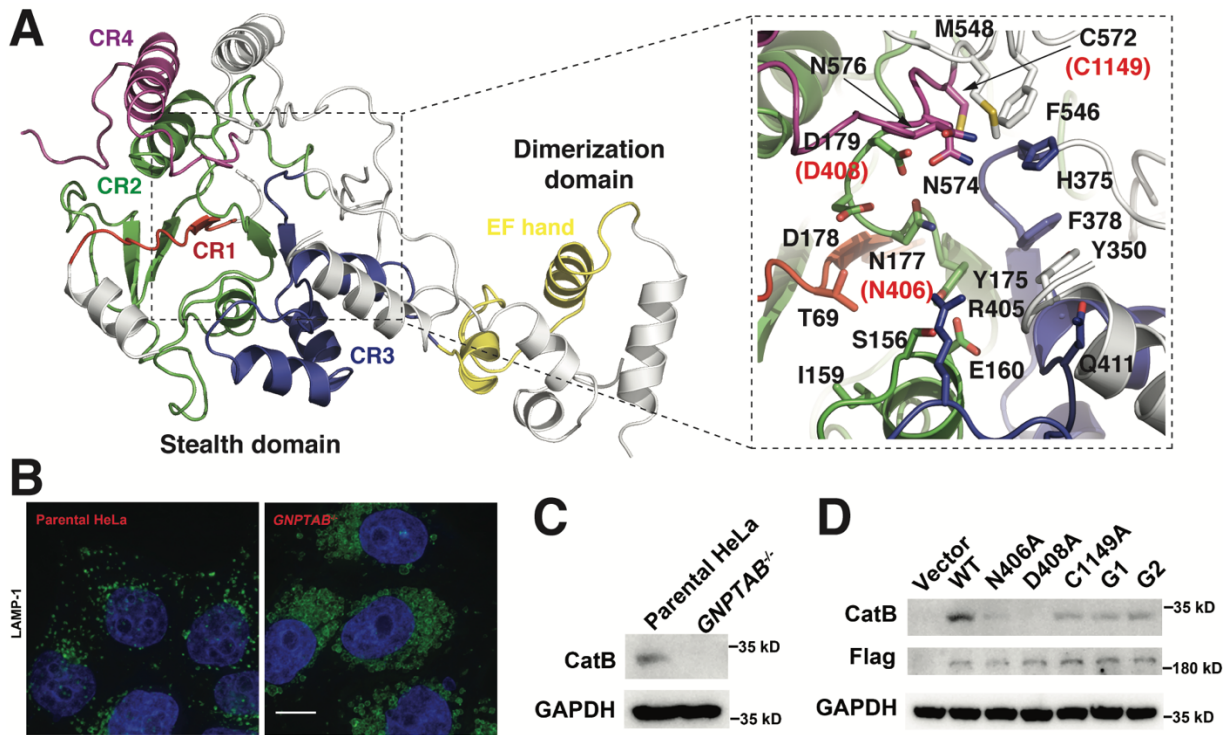

**Figure 2. Putative UDP-GlcNAc-binding pocket.**

A. DmGNPTAB contains a large Stealth domain and a small dimerization domain. Residues involved in forming the putative UDP-GlcNAc-binding pocket are highlighted in the enlarged panel. Human GNPTAB residues N406, D408, and C1149 that correspond to N177, D179, and C572 in DmGNPTAB are highlighted red.

B. Confocal immunofluorescence images of parental and GNPTAB-deficient HeLa cells stained using the late endosomal/lysosomal marker LAMP-1 (green). Nuclei are stained with DAPI (blue). The scale bar is 10  $\mu$ m.

C. Mature cathepsin B (CatB) was not detected in GNPTAB-deficient cells.

D. GNPTAB mutants could not fully rescue CatB processing in GNPTAB-deficient cells. The expression of GNPTAB was monitored using anti-Flag antibody.

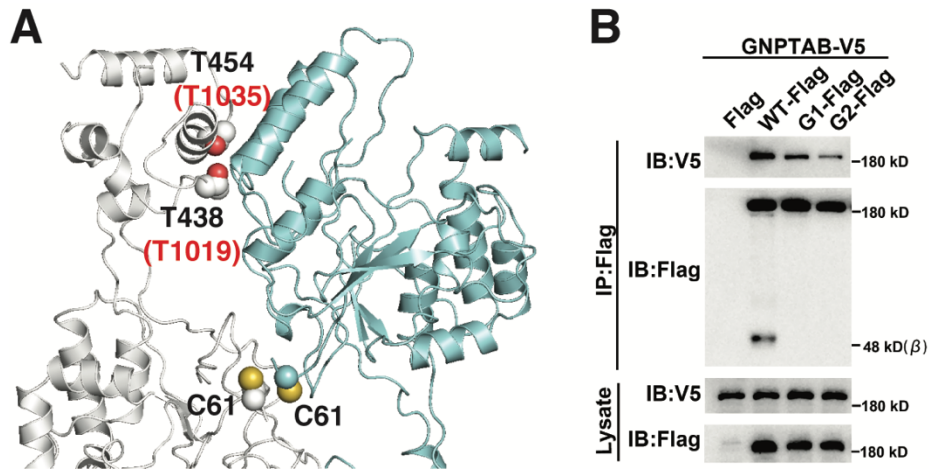

1

2

3 **Figure 3. Mutations in the dimer interface perturb human GNPTAB dimerization and**

4 **maturation.**

5 **A.** Structure of the DmGNPTAB dimer. Cys61, Thr438, and Thr454 are highlighted.

6 **B.** G1 (T1019N/D1020G/Q1021S) and G2 (T1035N/R1036G/I1037S) displayed defective

7 processing and diminished abilities to form heterodimers with WT GNPTAB.

8



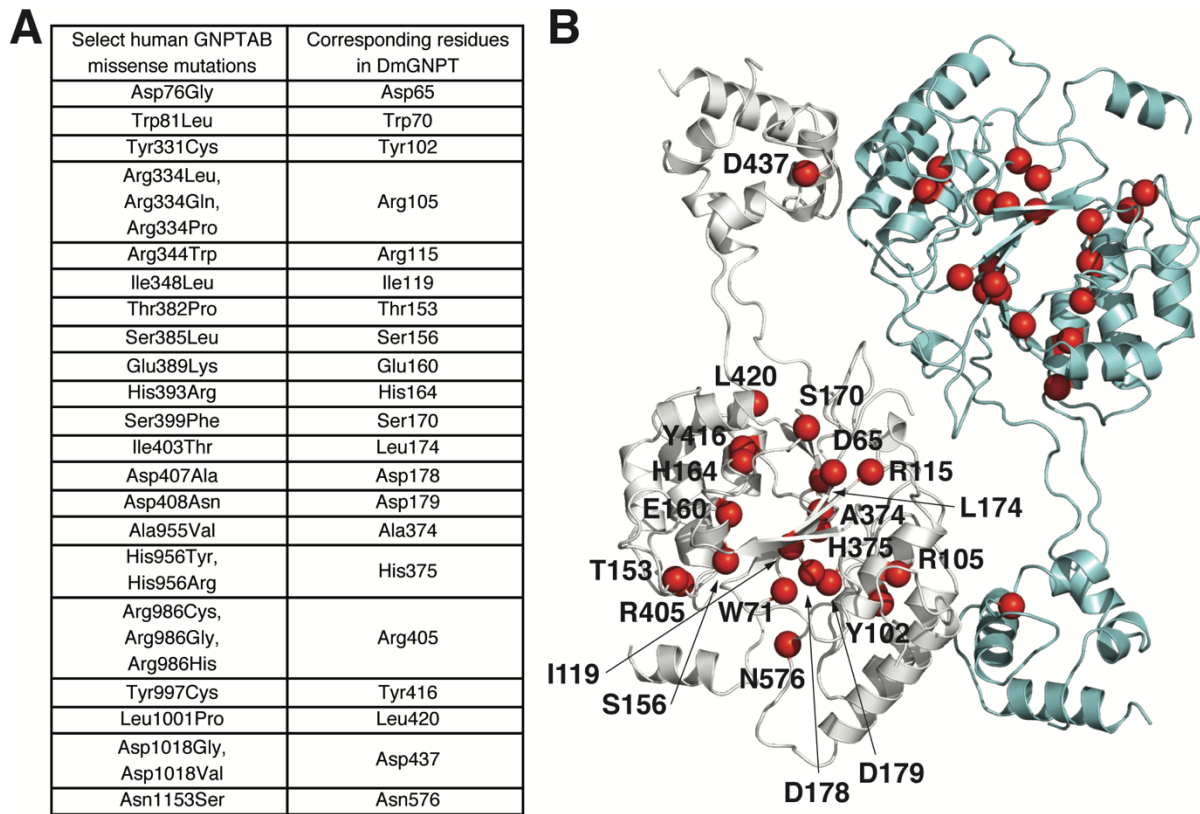

1

2

3 **Figure 4. Insights into human mucopolidoses.**

4 **A.** Select human GNPTAB missense mutations and the corresponding residues in  
5 DmGNPTAB.

6 **B.** The positions of DmGNPTAB residues listed in the previous panel are shown in the  
7 structure.

8

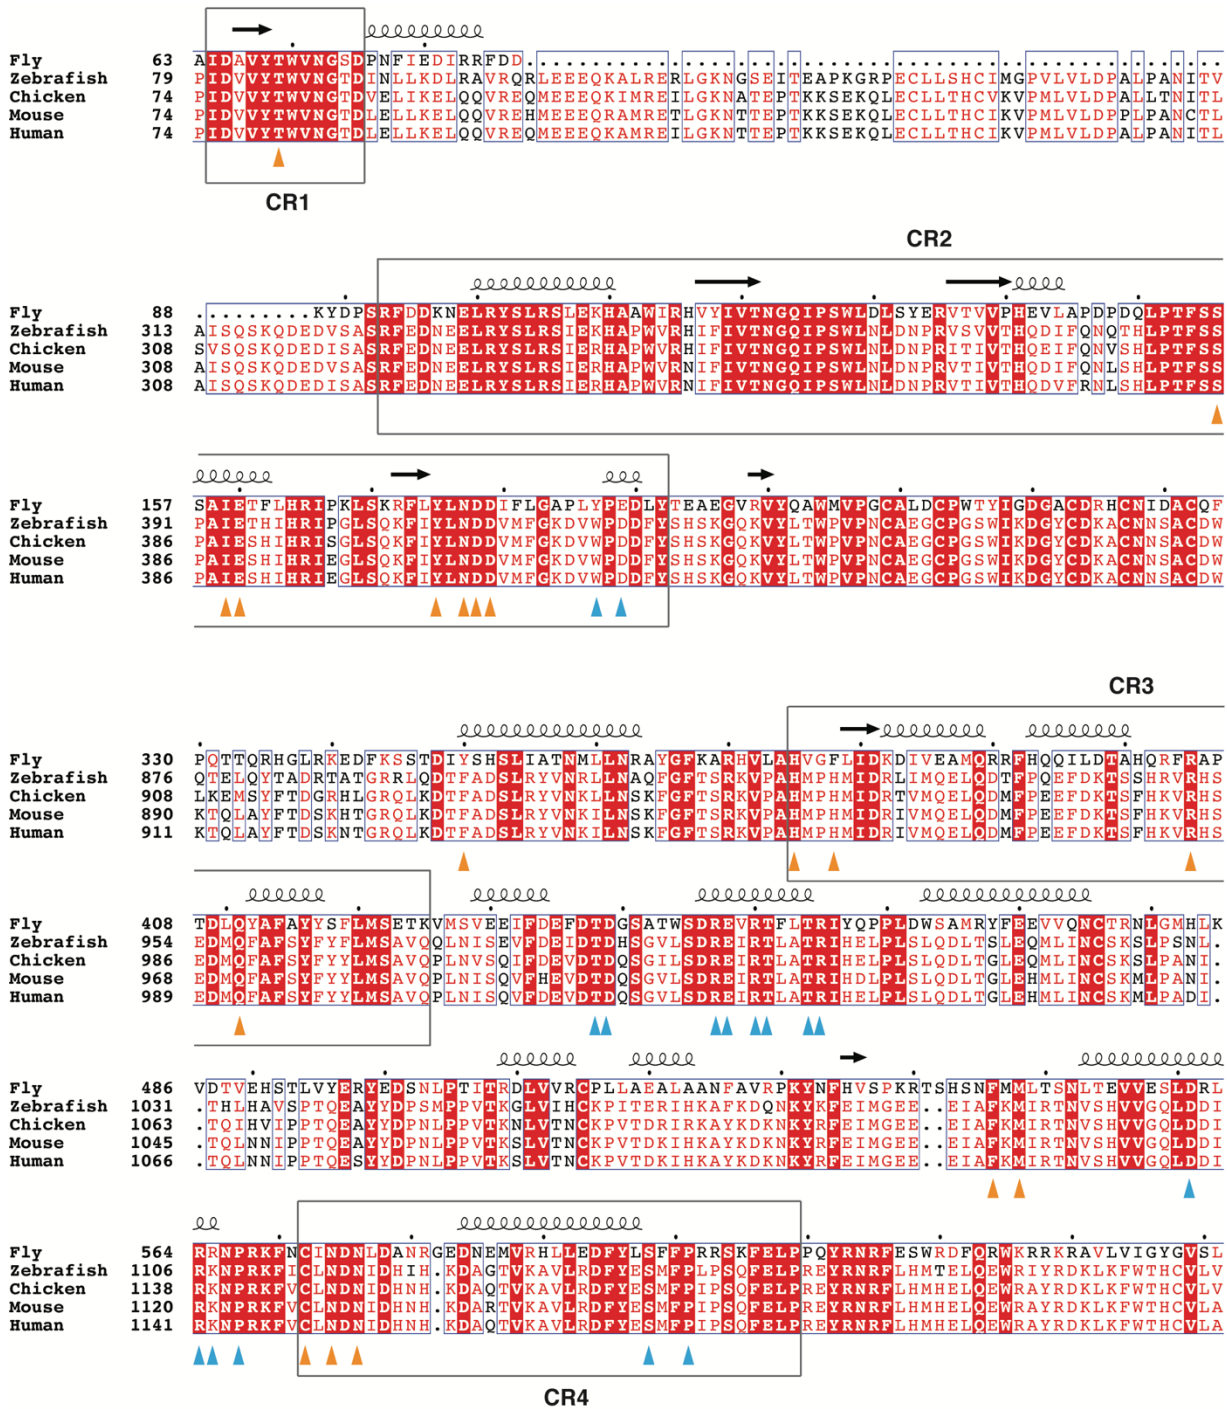

1  
2  
3  
4  
5  
6  
7

**Figure S1. Structure-based sequence alignment of select GNPTAB homologs around the four CRs.** The residues that are likely involved in sugar nucleotide binding and dimer formation are indicated by orange and cyan triangles below the sequence blocks, respectively.

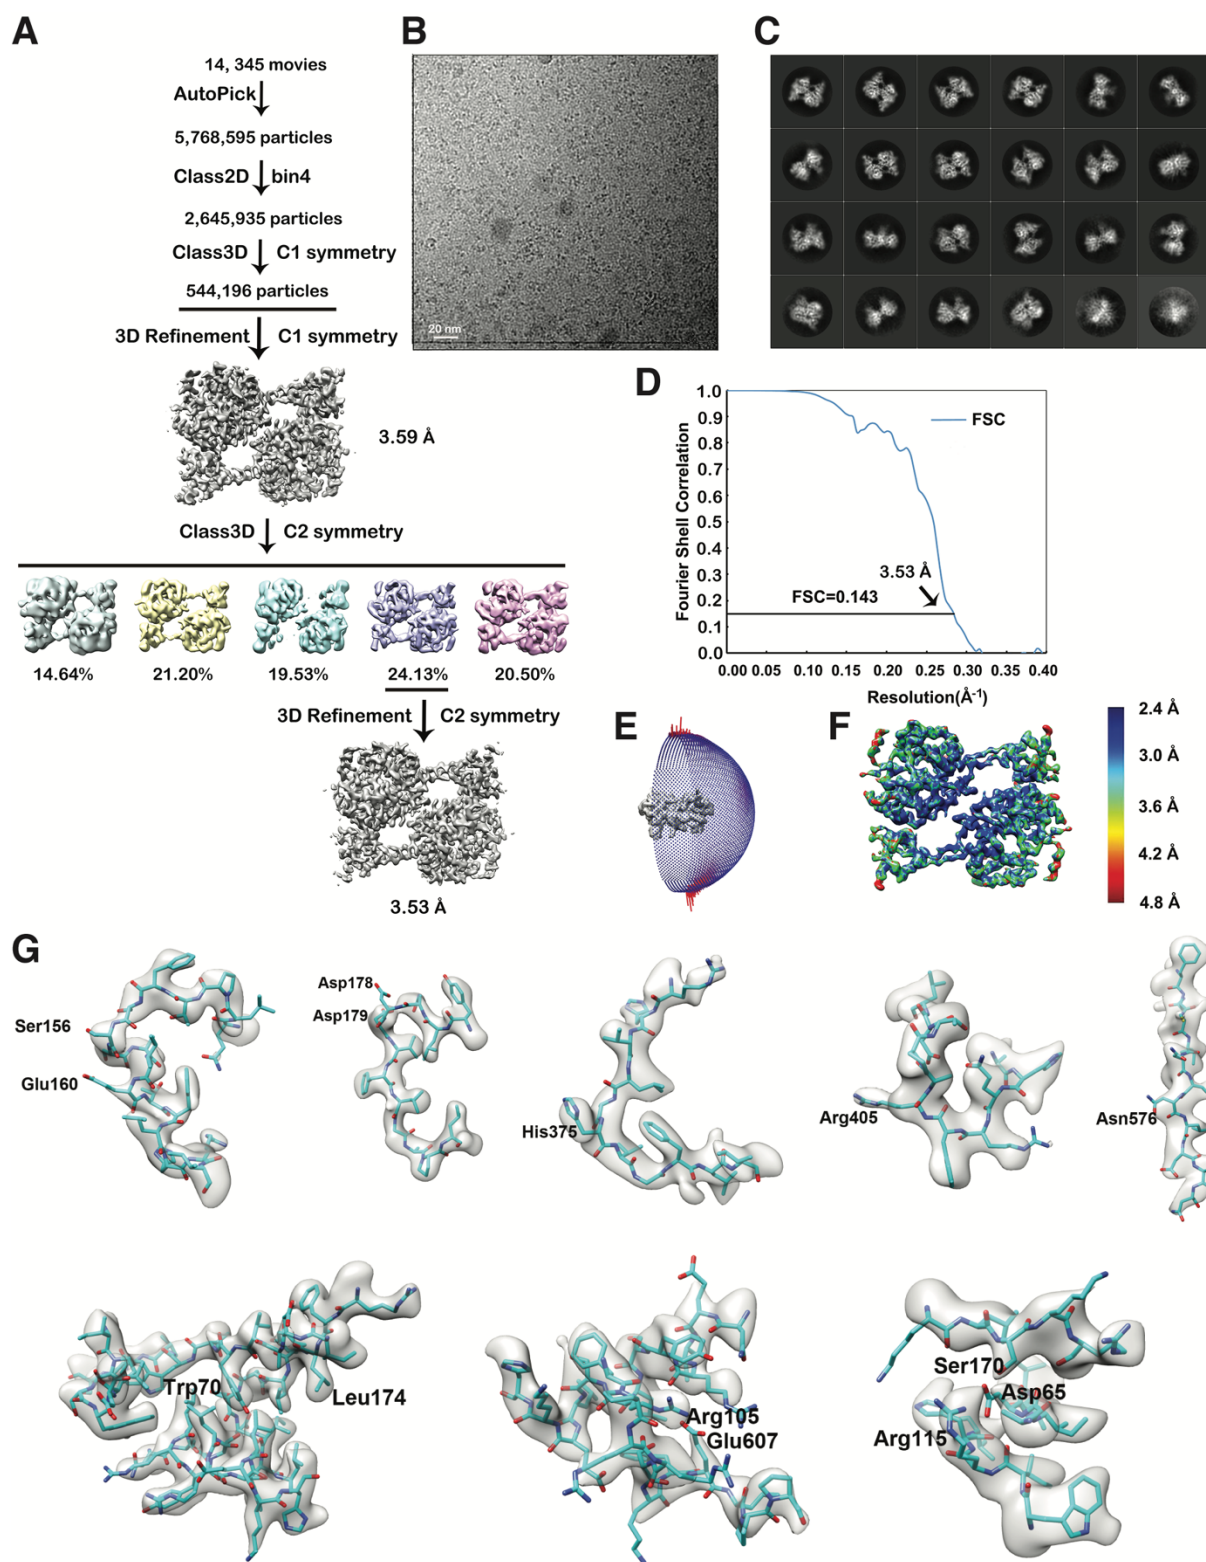

**Figure S2. Workflow for cryo-EM structure reconstruction.**

A. Workflow for cryo-EM data processing.

B. Representative raw cryo-EM image.

C. Representative 2D classes.

D. Gold-standard Fourier shell correlation (FSC) curve with estimated resolution.

E. Eulerian angle distribution of the particles used in the final 3D refinement.

F. Local resolution estimation of the final map.

G. Cryo-EM density maps around select DmGNPTAB residues described in the manuscript.

**A**

| Chain  | Z score | rmsd | lali | % id | PDB Description                                |
|--------|---------|------|------|------|------------------------------------------------|
| 4cj8-H | 11.4    | 3.6  | 195  | 9    | GLYCOSYLTRANSFERASE FAMILY 6                   |
| 4ayl-A | 11.3    | 3.6  | 180  | 9    | BOGT-METAL-INDEPENDENT GLYCOSYLTRANSFERASE     |
| 5gvv-A | 10.9    | 4.1  | 195  | 11   | GLYCOSYL TRANSFERASE FAMILY 8                  |
| 1s4n-A | 10.7    | 3.4  | 195  | 10   | GLYCOLIPID 2-ALPHA-MANNOSYLTRANSFERASE         |
| 3tzt-A | 10.5    | 3.7  | 188  | 13   | GLYCOSYL TRANSFERASE FAMILY 8                  |
| 6u4b-A | 10.5    | 3.9  | 213  | 10   | WBBM PROTEIN                                   |
| 5a07-A | 10.3    | 3.7  | 198  | 9    | PROBABLE MANNOSYLTRANSFERASE KTR4              |
| 7boo-C | 10.3    | 4    | 200  | 9    | ALPHA-1,2-MANNOSYLTRANSFERASE (KTR4), PUTATIVE |
| 4ueg-B | 10.3    | 4    | 188  | 11   | GLYCOGENIN-2                                   |
| 5n2j-B | 10.1    | 4.2  | 215  | 9    | UGGT                                           |
| 1ll0-B | 10      | 3.7  | 186  | 11   | GLYCOGENIN-1                                   |
| 1ss9-A | 10      | 3.4  | 189  | 9    | ALPHA-1,4-GALACTOSYL TRANSFERASE               |
| 6trf-A | 10      | 4.2  | 214  | 9    | UGGT                                           |
| 5h18-A | 10      | 4.4  | 207  | 10   | UGGT                                           |

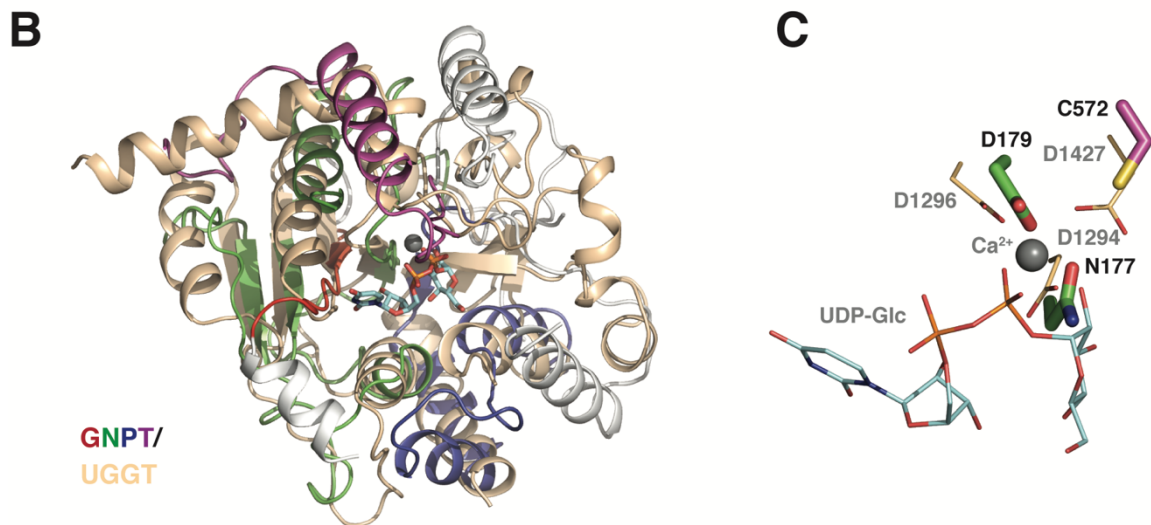

1

2 **Figure S3. The DmGNPTAB Stealth domain displays structural homology to a number**  
 3 **of glycosyltransferases, including UGGT.**

4 **A.** Top hits from a DALI search against a nonredundant subset of PDB structures.

5 **B.** Structural superposition of DmGNPTAB and TdUGGT (PDB ID: 5H18). Both structures  
 6 are shown using the same color scheme as in Figure 2.

7 **C.** Asn177, Asp179, and Cys572 in DmGNPTAB appear to align with Asp1294, Asp1296,  
 8 and Asp1427 in TdUGGT, which coordinate a Ca<sup>2+</sup> ion to position UDP-Glc.

9

**GNPTAB**

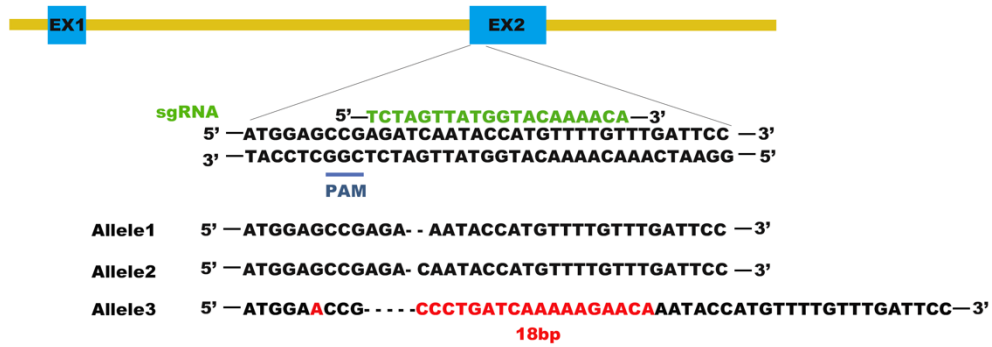

1

2 **Figure S4. Generation of the *GNPTAB*-knockout HeLa cell line by CRISPR-Cas9**

3 **genome editing.** The sequences of the mutated alleles are shown.

4

**Table S1. Cryo-EM data collection, processing and validation statistics**

|                                                      | GNPTAB (EMDB & PDB IDs: )                        |
|------------------------------------------------------|--------------------------------------------------|
| <b>Data collection and processing</b>                |                                                  |
| Voltage (kV)                                         | 300                                              |
| Microscope                                           | FEI Titan Krios G3                               |
| Camera                                               | K2 Summit (Gatan)                                |
| Magnification (calibrated)                           | 210,000X                                         |
| Electron exposure (e <sup>-</sup> /Å <sup>2</sup> )  | 60.29                                            |
| Exposure rate (e <sup>-</sup> /Å <sup>2</sup> /s)    | 18.84                                            |
| Number of frames collected per micrograph            | 32                                               |
| Energy filter slit width                             | 20 eV                                            |
| Automation software                                  | SerialEM                                         |
| Defocus range (µm)                                   | -1.0 to -2.2                                     |
| Pixel size (Å)                                       | 0.6516                                           |
| Micrographs used                                     | 14,345                                           |
| Estimated accuracy of rotations                      | 2.447                                            |
| Symmetry imposed                                     | C2                                               |
| Initial particle images                              | 5,768,795                                        |
| Final particle images                                | 131,301                                          |
| Resolution at 0.143 FSC of masked reconstruction (Å) | 3.53                                             |
| <b>Refinement</b>                                    |                                                  |
| Initial model used (PDB code)                        | none                                             |
| Refinement package                                   | Phenix v1.18.2 (Real-space refinement at 3.53 Å) |
| Map-model CC                                         |                                                  |
| CC_mask                                              | 0.81                                             |
| CC_box                                               | 0.73                                             |
| CC_peaks                                             | 0.64                                             |
| CC_volume                                            | 0.79                                             |
| Model composition                                    |                                                  |
| Non-hydrogen atoms                                   | 6,130                                            |
| Protein residues                                     | 742                                              |
| Ligands                                              | 2                                                |
| <i>B</i> factors (Å <sup>2</sup> )                   |                                                  |
| Protein                                              | 24.82                                            |
| Ligands                                              | 62.76                                            |
| R.m.s. deviations                                    |                                                  |
| Bond lengths (Å)                                     | 0.006                                            |
| Bond angles (°)                                      | 1.292                                            |
| Validation                                           |                                                  |
| MolProbity score                                     | 1.89                                             |
| Clashscore                                           | 4.71                                             |
| Poor rotamers (%)                                    | 0.30                                             |
| Ramachandran plot                                    |                                                  |
| Favored (%)                                          | 85.54                                            |
| Allowed (%)                                          | 13.91                                            |
| Disallowed (%)                                       | 0.55                                             |
| Cβ outliers (%)                                      | 0.00                                             |

3
